# Supplementary material for: Interaction Between Functionally Activate Endometrial Microbiota and Host Gene Regulation in Endometrial Cancer
Source: Front Cell Dev Biol. 2021 Sep 23;9:727286. doi: 10.3389/fcell.2021.727286 (PMC8495019; doi:10.3389/fcell.2021.727286)
Supplement: Supplementary Table 3 — Differentially expressed genes between the EC group and the normal group. [file Table_3.XLSX]

## Sheet: humann3_pathabundance_cpm
ID	S856N	S861N	S862N	S863N	S866N	S868N	S870N	S871N	S874T	S879T	S880T	S881T	S884T	S887T	S888T	S889T	S890T
1CMET2-PWY: folate transformations III (E. coli)	0	0	0	0	0	0	0	0	0	0	0	0	0	0	0	0	11.3129
ANAGLYCOLYSIS-PWY: glycolysis III (from glucose)	47.5986	28.2139	19.7493	0	40.251	38.2343	42.9651	31.7076	48.7265	41.6428	18.527	36.8853	66.4396	85.67	56.2655	25.5929	74.9893
ARGININE-SYN4-PWY: L-ornithine biosynthesis II	0	0	0	0	0	0	0	6.05095	0	0	0	10.2357	7.65322	0	0	0	0
ASPASN-PWY: superpathway of L-aspartate and L-asparagine biosynthesis	0	0	0	0	0	0	0	0	0	0	0	0	0	0	17.6895	0	0
FAO-PWY: fatty acid &beta;-oxidation I (generic)	14.9196	0	0	0	0	0	0	0	0	0	0	17.9193	0	0	0	0	0
ILEUDEG-PWY: L-isoleucine degradation I	11.1891	0	0	0	0	0	18.4425	14.9594	0	0	0	0	0	0	0	0	22.3247
LEU-DEG2-PWY: L-leucine degradation I	0	0	0	0	0	0	10.8752	6.73735	0	0	0	0	0	0	0	0	0
LIPASYN-PWY: phospholipases	18.6637	0	0	28.9201	24.0541	19.0333	38.5925	5.89088	25.3325	0	2.53028	25.1157	28.8474	0	4.01772	4.43856	9.71112
LYSINE-DEG1-PWY: L-lysine degradation XI (mammalian)	13.0812	10.3806	8.19864	28.4061	19.1101	18.5872	16.4936	10.9573	0	23.2026	0	12.3526	0	0	13.4867	10.8433	8.52521
NAD-BIOSYNTHESIS-II: NAD salvage pathway III (to nicotinamide riboside)	0	0	0	0	0	0	0	0	0	0	0	0	0	0	0	0	7.22036
NONOXIPENT-PWY: pentose phosphate pathway (non-oxidative branch) I	0	0	0	0	0	0	0	0	0	0	0	0	0	0	0	0	4.99386
PENTOSE-P-PWY: pentose phosphate pathway	0	0	0	0	0	0	0	0	0	0	0	0	0	0	0	0	7.88866
PWY-1042: glycolysis IV	92.0524	54.2719	0	0	53.6115	75.703	78.5628	92.5909	60.3071	0	0	51.289	59.6811	0	64.5954	13.7259	112.282
PWY-3781: aerobic respiration I (cytochrome c)	383.762	271.137	99.6431	226.774	238.699	239.36	287.033	264.356	308.185	150.835	119.458	285.526	303.207	487.233	278.504	181.799	300.873
PWY-3841: folate transformations II (plants)	0	0	0	0	0	0	0	0	15.442	0	0	0	0	0	0	0	13.3608
PWY-4041: gamma-glutamyl cycle	3.96135	0	0	0	0	0	6.95149	0	10.9142	19.4747	7.8761	13.8963	13.8845	27.9528	16.0226	11.4239	13.0852
PWY-5067: glycogen biosynthesis II (from UDP-D-Glucose)	11.4118	0	0	0	0	0	16.0645	12.4322	0	0	0	0	0	22.0055	10.235	0	7.14701
PWY-5080: very long chain fatty acid biosynthesis I	24.5453	44.9845	0	0	17.071	41.1693	46.8363	39.4022	18.2353	44.5893	13.168	39.9601	37.6855	26.8423	40.8286	39.2155	21.6645
PWY-5109: propanoate fermentation to 2-methylbutanoate	0	0	0	0	0	0	0	14.818	0	0	0	0	0	0	0	0	0
PWY-5129: sphingolipid biosynthesis (plants)	11.155	0	0	0	0	0	0	0	0	0	0	0	0	0	11.887	0	0
PWY-5136: fatty acid &beta;-oxidation II (plant peroxisome)	17.6513	0	0	0	0	0	0	18.9523	0	0	0	17.4996	0	0	0	0	19.212
PWY-5189: tetrapyrrole biosynthesis II (from glycine)	0	0	0	0	0	0	0	0	0	0	0	0	0	0	0	0	7.91254
PWY-5514: UDP-N-acetyl-D-galactosamine biosynthesis II	7.08997	0	0	0	0	0	0	0	0	0	0	0	0	0	0	0	0
PWY-5659: GDP-mannose biosynthesis	24.2348	0	0	0	0	37.3049	35.3796	36.8156	0	0	0	0	0	0	40.8491	0	8.10777
PWY-5667: CDP-diacylglycerol biosynthesis I	31.6573	99.9832	15.3419	0	8.81179	37.3262	25.809	35.0179	20.0753	0	0	45.5428	90.5175	43.2405	75.1438	0	62.3233
PWY-5690: TCA cycle II (plants and fungi)	36.2192	0	0	0	0	0	18.8864	30.6587	28.6183	0	0	48.2345	60.3188	0	35.9724	0	22.9124
PWY-5695: inosine 5'-phosphate degradation	0	0	0	0	0	0	0	2.59957	24.6183	0	0	0	0	0	8.60137	0	0
PWY-6124: inosine-5'-phosphate biosynthesis II	0	0	0	0	0	0	0	0	0	0	0	37.2749	0	0	25.2694	0	0
PWY-6125: superpathway of guanosine nucleotides de novo biosynthesis II	11.8532	0	0	0	0	0	0	13.6917	12.1789	0	0	12.6783	10.9548	0	0	12.9931	0
PWY-6126: superpathway of adenosine nucleotides de novo biosynthesis II	15.9848	0	0	0	13.4682	30.1884	18.3855	24.9251	13.8462	0	0	39.7269	13.3057	0	24.6177	15.9665	30.227
PWY-6281: L-selenocysteine biosynthesis II (archaea and eukaryotes)	0	0	0	0	0	0	0	0	0	0	0	0	0	0	0	0	7.323
PWY-6307: L-tryptophan degradation X (mammalian, via tryptamine)	0	0	0	0	0	0	0	27.8616	17.429	0	0	0	0	35.7919	0	29.5765	31.3223
PWY-6309: L-tryptophan degradation XI (mammalian, via kynurenine)	0	0	0	0	0	15.5432	17.8252	12.0274	0	43.9984	0	0	0	46.0183	30.5461	0	20.3632
PWY-6313: serotonin degradation	42.7309	55.572	29.3986	57.4852	58.0169	70.6976	68.1504	63.3323	66.7305	0	23.9891	64.9111	48.9578	106.086	66.4792	66.5716	98.7177
PWY-6317: D-galactose degradation I (Leloir pathway)	7.62886	0	0	0	0	0	0	0	0	0	0	0	0	0	0	0	0
PWY-6342: noradrenaline and adrenaline degradation	0	0	0	0	0	41.8391	0	23.0487	0	0	0	0	17.498	0	0	25.5768	32.5548
PWY-6351: D-myo-inositol (1,4,5)-trisphosphate biosynthesis	29.2233	23.239	10.5455	15.42	19.1421	24.9675	32.041	19.8104	26.839	24.8581	6.96061	17.0334	36.4495	19.464	33.5086	32.0827	22.7497
PWY-6352: 3-phosphoinositide biosynthesis	29.4552	39.4481	0	0	18.0256	20.064	13.3097	17.4847	0	20.5996	0	14.2789	14.2044	21.1876	20.7104	12.1715	15.7132
PWY-6358: superpathway of D-myo-inositol (1,4,5)-trisphosphate metabolism	20.4468	0	0	0	0	34.3672	27.2223	0	0	0	0	20.2084	0	0	0	0	27.2074
PWY-6362: 1D-myo-inositol hexakisphosphate biosynthesis II (mammalian)	0	0	0	0	0	0	0	0	0	0	0	0	0	0	0	0	17.8816
PWY-6367: D-myo-inositol-5-phosphate metabolism	30.9657	40.4812	0	12.4561	17.8192	41.1191	50.4412	40.767	21.2834	53.1332	7.73538	46.251	29.0133	13.0453	46.1898	26.0473	13.5843
PWY-6368: 3-phosphoinositide degradation	60.1974	49.5437	13.11	0	57.6432	80.022	71.7709	34.9968	18.2148	20.9407	19.0826	25.7302	36.492	18.3463	51.3206	28.3234	59.916
PWY-6433: hydroxylated fatty acid biosynthesis (plants)	45.8269	59.3786	0	0	0	48.4795	59.23	35.8901	0	55.7583	30.3699	34.2895	65.563	0	66.5265	45.638	43.4692
PWY-6554: 1D-myo-inositol hexakisphosphate biosynthesis V (from Ins(1,3,4)P3)	0	0	0	0	0	0	0	0	0	0	0	0	0	0	0	0	12.6214
PWY-6555: superpathway of 1D-myo-inositol hexakisphosphate biosynthesis (plants)	0	0	0	0	0	0	0	0	0	0	0	0	0	0	0	0	16.5433
PWY-6598: sciadonate biosynthesis	24.5453	44.9845	0	0	17.071	41.1693	46.8363	39.4022	18.2353	44.5893	13.168	39.9601	37.6855	26.8423	40.8286	39.2155	21.6645
PWY-6609: adenine and adenosine salvage III	0	0	0	0	0	0	0	1.75168	18.2725	0	0	0	0	0	5.88069	0	0
PWY-6803: phosphatidylcholine acyl editing	56.2384	75.8776	0	43.8901	35.8964	48.8443	53.2103	39.0169	25.1578	151.086	41.385	158.002	75.7756	96.4693	93.3696	72.9349	73.7069
PWY-7036: very long chain fatty acid biosynthesis II	15.6104	20.833	0	0	16.8663	24.6611	24.8212	15.4302	14.6486	27.3873	12.9037	8.81822	27.9828	0	24.7691	13.3594	18.8604
PWY-7039: phosphatidate metabolism, as a signaling molecule	27.0184	0	0	25.9547	20.1063	17.3037	49.3213	5.06683	32.0791	0	0	26.9405	29.9364	0	0	0	7.82405
PWY-7049: icosapentaenoate biosynthesis II (6-desaturase, mammals)	11.2095	0	0	0	13.843	27.5908	18.2208	18.0595	0	22.2966	11.5272	0	21.9351	0	17.2176	17.837	16.106
PWY-7053: docosahexaenoate biosynthesis I (lower eukaryotes)	11.6351	14.8055	0	0	13.7979	17.8426	17.6098	10.4548	9.97191	22.4778	11.2208	5.95877	21.314	0	18.22	9.13532	15.4876
PWY-7184: pyrimidine deoxyribonucleotides de novo biosynthesis I	12.171	0	0	0	0	0	0	0	0	0	0	22.3046	11.317	0	9.6162	0	16.5936
PWY-7185: UTP and CTP dephosphorylation I	47.4753	49.6822	0	0	0	0	36.6907	22.5115	0	0	25.0391	43.2662	0	27.5137	50.3932	35.5288	46.293
PWY-7197: pyrimidine deoxyribonucleotide phosphorylation	23.6435	45.0734	41.6386	36.2776	18.9478	23.0825	19.7039	21.0253	24.1822	46.1669	22.7805	28.2849	20.4061	38.7752	27.502	21.0989	31.9861
PWY-7199: pyrimidine deoxyribonucleosides salvage	8.73663	0	0	0	0	0	0	0	0	0	0	0	15.6937	0	0	0	6.90103
PWY-7204: pyridoxal 5'-phosphate salvage II (plants)	9.99274	0	0	0	0	0	11.75	13.9164	0	0	0	0	22.459	0	0	0	0
PWY-7208: superpathway of pyrimidine nucleobases salvage	64.0129	90.9007	48.2911	36.2986	0	53.5722	52.8703	46.0336	57.562	35.8175	40.9392	61.3053	46.0661	32.1758	62.505	39.1852	71.0793
PWY-7210: pyrimidine deoxyribonucleotides biosynthesis from CTP	13.1163	0	0	0	0	0	0	0	0	0	0	0	0	0	10.7426	0	0
PWY-7219: adenosine ribonucleotides de novo biosynthesis	47.5434	77.6276	22.4838	0	59.3413	46.0767	60.5188	42.4988	55.3223	59.8336	45.907	99.2526	87.9893	154.698	69.9124	52.4844	73.4885
PWY-7220: adenosine deoxyribonucleotides de novo biosynthesis II	9.69075	0	0	0	9.26171	29.9012	10.6669	20.363	7.96267	0	0	26.0738	7.01296	0	18.6712	34.1645	30.0771
PWY-7221: guanosine ribonucleotides de novo biosynthesis	20.2575	12.3269	13.0831	0	16.2306	26.6088	10.6018	28.627	29.0452	9.62807	7.84013	13.4024	20.201	26.48	14.3639	38.4919	5.52386
PWY-7222: guanosine deoxyribonucleotides de novo biosynthesis II	9.69075	0	0	0	9.26171	29.9012	10.6669	20.363	7.96267	0	0	26.0738	7.01296	0	18.6712	34.1645	30.0771
PWY-7228: superpathway of guanosine nucleotides de novo biosynthesis I	14.1225	0	0	0	13.019	29.3149	11.5086	25.264	19.225	0	0	16.7648	19.4872	17.245	16.6118	38.0983	7.73462
PWY-7229: superpathway of adenosine nucleotides de novo biosynthesis I	21.0065	0	0	0	16.6192	32.2764	24.6364	28.3524	18.8108	0	0	49.7588	19.075	0	29.0717	15.0762	32.7082
PWY-7237: myo-, chiro- and scyllo-inositol degradation	0	0	0	0	0	0	0	0	0	0	0	10.3304	0	0	0	0	0
PWY-7277: sphingolipid biosynthesis (mammals)	11.3826	0	0	0	0	4.27824	0	2.18274	0	0	0	0	0	0	11.5703	0	0
PWY-7279: aerobic respiration II (cytochrome c) (yeast)	133.565	49.5618	23.9112	101.22	32.313	75.4023	94.7625	50.7937	156.255	74.0653	45.411	56.0294	139.679	177.993	86.754	61.9209	100.815
PWY-7286: 7-(3-amino-3-carboxypropyl)-wyosine biosynthesis	12.8297	21.7932	0	0	0	0	0	18.4996	0	0	0	0	0	0	14.2483	0	0
PWY-7288: fatty acid &beta;-oxidation VII (yeast peroxisome)	19.264	23.4282	12.039	0	16.5394	22.5357	17.5743	19.8542	21.5346	0	0	20.6514	26.3609	43.806	20.858	14.3776	28.7432
PWY-7379: mRNA capping II	0	0	0	0	0	0	0	11.1958	0	0	0	8.13179	0	0	0	0	0
PWY-7409: phospholipid remodeling (phosphatidylethanolamine, yeast)	23.9193	47.31	0	60.432	25.5262	35.0144	23.3771	17.1032	0	128.97	36.4488	122.886	48.3788	60.3489	77.4063	22.452	39.2233
PWY-7411: phosphatidate biosynthesis (yeast)	18.4371	0	0	0	0	0	23.3339	28.9116	0	0	0	0	32.2632	0	36.4197	0	0
PWY-7426: complex N-linked glycan biosynthesis (vertebrates)	7.50637	0	0	0	0	0	0	0	0	0	0	0	0	0	0	0	0
PWY-7431: aromatic biogenic amine degradation (bacteria)	38.2379	22.0479	8.1113	24.919	26.2127	61.1844	58.8211	30.5085	16.1425	0	0	57.0813	16.4407	27.3092	53.6547	23.6897	30.3763
PWY-7433: mucin core 1 and core 2 O-glycosylation	0	0	0	0	0	0	0	0	12.1742	0	0	24.1455	0	0	0	0	0
PWY-7434: terminal O-glycans residues modification (via type 2 precursor disaccharide)	6.30206	14.8481	0	0	15.0152	15.5703	9.92363	0	18.1152	0	12.353	32.8915	23.2902	87.1648	48.2652	24.2249	30.6679
PWY-7511: protein ubiquitination	96.4123	197.333	84.9095	160.934	103.235	122.563	139.935	107.391	92.4001	190.98	91.9595	305.973	180.614	276.432	167.322	72.568	87.3728
PWY-7546: diphthamide biosynthesis II (eukaryotes)	4.02467	0	0	0	0	0	0	0	0	0	0	0	0	0	0	0	0
PWY-7592: arachidonate biosynthesis III (6-desaturase, mammals)	9.81655	12.4911	0	0	14.3291	30.4951	15.3258	17.2188	9.88727	18.4464	9.27814	4.8157	18.3173	0	18.7799	19.8294	13.0854
PWY-7606: docosahexaenoate biosynthesis III (6-desaturase, mammals)	13.8053	16.9812	0	0	15.6144	22.694	22.4473	14.3608	12.6833	22.9483	10.2449	7.38461	23.7381	0	19.3959	12.1437	17.9274
PWY-7619: juniperonate biosynthesis	24.7554	45.4005	0	0	17.5442	41.7408	47.2865	39.782	18.3179	46.3311	13.2531	41.2374	37.9478	26.9143	41.1779	39.7921	21.903
PWY-7654: (8E,10E)-dodeca-8,10-dienol biosynthesis	21.5036	0	0	0	21.6913	25.4668	28.9523	20.4174	29.9249	36.5422	9.30713	31.5334	0	42.7829	28.0145	20.8599	24.9153
PWY-7656: Spodoptera littoralis pheromone biosynthesis	21.3268	0	0	0	15.3529	23.0384	26.7235	22.3794	41.5315	33.3356	13.3548	22.6706	0	42.6225	24.2652	18.6373	29.8583
PWY0-1319: CDP-diacylglycerol biosynthesis II	31.6573	99.9832	15.3419	0	8.81179	37.3262	25.809	35.0179	20.0753	0	0	45.5428	90.5175	43.2405	75.1438	0	62.3233
PWY66-201: nicotine degradation IV	31.9686	0	0	0	51.2869	0	28.7635	26.004	25.6842	0	0	45.56	0	0	21.9308	0	0
PWY66-374: C20 prostanoid biosynthesis	0	0	0	55.4396	0	0	0	0	0	0	0	30.8316	0	0	0	6.39806	0
PWY66-375: leukotriene biosynthesis	34.3083	37.8588	43.4486	105.284	41.1089	51.1591	48.6635	27.9985	41.1232	73.7006	34.0544	42.4871	44.6546	67.0874	69.1898	20.7556	22.7144
PWY66-388: ceramide degradation by &alpha;-oxidation	32.0872	35.6613	0	0	21.5447	39.0584	31.9911	22.7376	15.6658	26.6329	14.048	58.6599	22.1245	29.0502	52.1543	26.0864	26.919
PWY66-389: phytol degradation	56.5536	43.3973	0	0	24.7813	49.0086	54.583	28.767	0	28.7672	0	25.7449	23.549	29.9967	69.4367	33.4783	41.7666
PWY66-391: fatty acid &beta;-oxidation VI (mammalian peroxisome)	18.4734	0	0	0	0	0	0	19.8542	0	0	0	17.4644	0	0	0	0	22.9963
PWY66-398: TCA cycle III (animals)	25.8498	0	0	0	0	0	12.6421	0	12.7646	0	0	0	0	0	12.406	0	0
PWY66-409: superpathway of purine nucleotide salvage	0	0	0	0	0	0	0	0	16.3293	0	0	0	0	0	0	0	0
PWY6666-2: dopamine degradation	34.1452	55.572	29.3986	57.4852	12.1401	56.5064	47.2384	54.9623	66.7305	0	23.9891	64.9111	48.9578	85.3335	58.0653	66.5716	98.7177
TCA: TCA cycle I (prokaryotic)	43.5166	0	0	0	0	0	0	0	33.5773	0	0	58.3867	0	0	49.0962	0	0
UDPNACETYLGALSYN-PWY: UDP-N-acetyl-D-glucosamine biosynthesis II	5.5307	0	0	0	0	0	0	0	0	0	0	10.5179	8.92712	0	0	0	0
VALDEG-PWY: L-valine degradation I	0	0	0	0	0	0	0	0	0	0	0	20.7465	0	0	0	0	0
